# Supplementary material for: Rheological characterizations and molecular dynamics simulations of self-assembly in an anionic/cationic surfactant mixture
Source: Royal Society of Chemistry journal article supplement (doi:10.1039/c6sm00759g), 2016-01-01
Supplement: c6sm00759g1.pdf [file c6sm00759g1.pdf]

**Rheological Characterizations and Molecular Dynamics Simulations of Self-  
assemblies in Anionic/Cationic Surfactant Mixture**

Zhihu Yan<sup>a</sup>, Caili Dai<sup>\*a</sup>, Mingwei Zhao<sup>a</sup>, Yongpeng Sun<sup>a</sup>

<sup>a</sup>School of Petroleum Engineering, State Key Laboratory of Heavy Oil Processing, China University of Petroleum (East China), Qingdao, Shandong, 266580, P. R. China.

E-mail: daicl@upc.edu.cn;

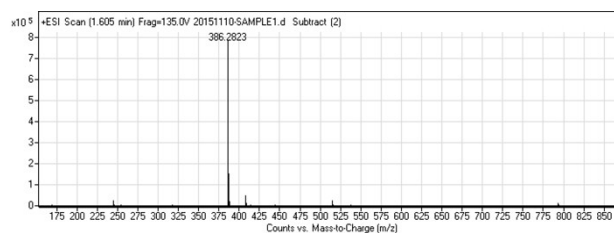

**Fig. S1.** The mass spectrogram of HGA.

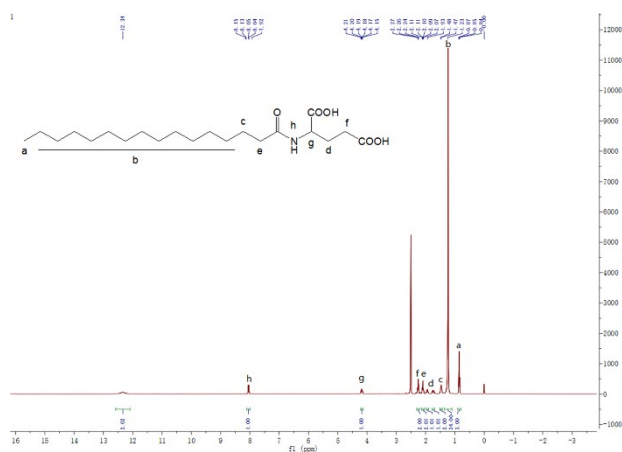

**Fig. S2.** <sup>1</sup>H NMR spectroscopy of HGA.

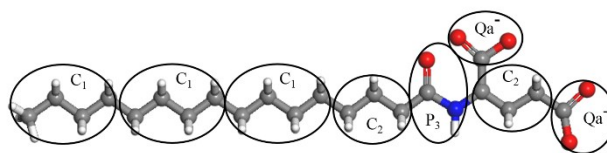

**Fig. S3.** The scheme for HGA.

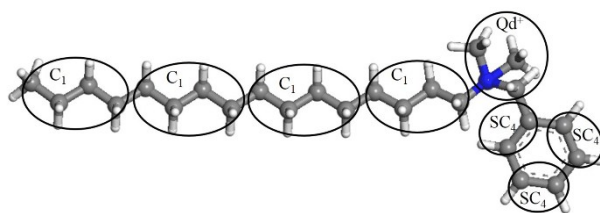

**Fig. S4.** The scheme for HDBAC.
